# Supplementary material for: An EHBP-1-SID-3-DYN-1 axis promotes membranous tubule fission during endocytic recycling
Source: PLoS Genet. 2020 May 8;16(5):e1008763. doi: 10.1371/journal.pgen.1008763 (PMC7239482; doi:10.1371/journal.pgen.1008763)
Supplement: S4 Table — (XLSX) [file pgen.1008763.s011.xlsx]

## Sheet: figure 4A
Total Area (per unit region)
GFP-NCK-1	GFP-NCK-1;sid-3(RNAi)	GFP-NCK-1;ehbp-1(RNAi)	GFP-NCK-1;rab-10(RNAi)
327	48	63	729
277	101	59	734
285	98	119	972
196	117	94	704
183	61	166	759
199	99	172	896
245	72	193	659
158	120	149	818
306	135	107	1039
257	56	71	469
289	75	166	846
309	94	109	575
228	66	105	843
253	99	114	662
240	104	159	569
347	106	133	548
309	75	63	587
243	150	119	758
268	244	31	564
229	154	73	541
Mean Intensity (per unit region)
GFP-NCK-1	GFP-NCK-1;sid-3(RNAi)	GFP-NCK-1;ehbp-1(RNAi)	GFP-NCK-1;rab-10(RNAi)
786.377	713.526	645.561	875.81
790.88	726.79	616.611	935.615
823.804	606.018	638.361	893.653
836.768	586.374	687.512	967.503
833.679	565.819	619.658	970.643
848.457	687.763	529.439	950.21
787.969	535.914	524.752	896.037
803.734	541.761	560.596	866.212
793.31	582.008	524.07	908.726
792.097	535.268	537.826	965.721
798.533	527.666	770.34	864.575
796.13	537.308	541.681	865.697
811.48	528.544	692.117	759.79
806.26	536.427	619.141	845.275
796.518	592.648	623.967	1018.36
764.393	583.988	648.671	785.237
781.316	560.024	602.2	819.905
765.473	564.838	647.281	760.748
810.386	586.443	620.459	1040.64
805.516	627.041	587.72	985.678

## Sheet: figure 4B
Total Area (per unit region)
DYN-1-GFP	DYN-1-GFP;nck-1(ok694)	DYN-1-GFP;sid-3(ok973)	DYN-1-GFP;ehbp-1(RNAi)	DYN-1-GFP;rab-10(q373)
491	123	124	194	951
501	63	158	156	1070
470	88	113	198	1570
413	47	94	168	1108
683	98	64	155	1104
589	74	99	174	1228
428	66	35	250	1278
331	122	76	73	1278
391	98	58	149	1205
410	41	79	141	624
457	119	62	235	742
433	58	22	206	845
299	130	81	183	1097
326	143	57	205	964
351	55	68	281	921
593	71	49	150	974
661	160	29	53	1225
615	122	28	179	1002
285	73	35	74	719
360	46	47	85	564
Mean Intensity (per unit region)
DYN-1-GFP	DYN-1-GFP;nck-1(ok694)	DYN-1-GFP;sid-3(ok973)	DYN-1-GFP;ehbp-1(RNAi)	DYN-1-GFP;rab-10(q373)
440.192	331.185	203.354	244.204	505.176
420.814	193.455	206.612	219.406	506.23
393.062	202.666	198.94	218.144	478.124
353.73	172.64	262.473	196.87	348.429
309.445	162.763	195.089	197.878	368.249
323.576	164.887	221.877	285.177	419.975
420.032	188.86	272.071	280.364	369.067
406.758	228.081	246.908	268.324	369.6
334.271	224.27	299.506	248.826	480.375
448.666	174.085	239.682	195.501	375.132
457.916	186.855	327.574	202.45	318.16
381.117	181.477	190.762	212.994	287.855
446.322	181.403	228.199	179.123	460.957
368.321	189.555	241.242	218.923	318.16
401.2	167.243	223.539	197.427	363.727
304.242	203.395	222.031	311.116	614.291
356.791	197.487	190.525	215.231	420.913
331.75	227.223	279.108	213.007	401.368
452.438	238.64	356.917	315.523	348.406
507.082	246.317	252.38	295.374	369.587

## Sheet: figure 4C
Total Area (per unit region)
hTAC-GFP	hTAC-GFP;nck-1(ok694)	hTAC-GFP;dyn-1(RNAi)
313	4410	3970
477	4618	5517
234	4346	3884
480	4218	6296
320	2848	6548
307	3962	5172
223	7620	2335
185	7275	1109
364	6863	1051
329	6525	2004
196	7773	3039
309	7461	2905
180	4831	4069
188	5113	3413
282	5335	3020
295	4242	3396
226	3111	3854
417	3164	4098
639	3243	1363
477	3402	3627
Mean Intensity (per unit region)
hTAC-GFP	hTAC-GFP;nck-1(ok694)	hTAC-GFP;dyn-1(RNAi)
274.929	274.815	282.152
274.01	272.405	305.553
273.326	285.262	277.316
273.793	276.563	532.267
271.056	284.583	293.192
266.689	275.446	276.647
266.309	378.361	288.153
270.82	310.558	309.328
275.352	281.33	311.374
286.686	281.424	287.535
294.158	390.374	284.533
278.448	306.609	280.903
274.073	281.101	273.4
267.432	289.37	274.956
274.965	321.888	280.627
267.937	274.942	287.91
281.311	272.172	269.117
273.652	271.339	272.462
218.137	325.697	240.393
219.376	330.323	224.787

## Sheet: figure 4D
Pearson's Correlation Coefficient
DYN-1-GFP;SID-3-MC	DYN-1-GFP;SID-3-MC;nck-1(ok694)
0.757	0.286
0.779	0.349
0.853	0.278
0.791	0.321
0.8	0.605
0.734	0.383
0.648	0.509
0.76	0.492
0.699	0.279
0.64	0.506
0.739	0.358
0.739	0.372

## Sheet: figure 4E
Total Area (per unit region)
hTAC-GFP	hTAC-GFP;sid-3(ok973)	hTAC-GFP;sid-3(ok973);DYN-1-MC	hTAC-GFP;dyn-1(RNAi)	hTAC-GFP;dyn-1(RNAi);SID-3-MC
425	4534	743	3970	5676
450	5194	448	5517	4693
243	4412	323	3884	6015
608	5292	417	6296	3405
704	4302	462	6548	2860
582	4667	535	5172	2491
202	5395	348	2335	3377
266	4884	639	1109	2634
572	5752	638	1051	7064
776	5723	928	2004	5459
620	5897	256	3039	3978
321	4927	256	2905	5630
457	4485	235	4069	3565
533	7652	341	3413	5961
385	5541	697	3020	3200
573	6865	678	3396	2796
406	7537	498	3854	3586
737	5124	601	4098	3733
623	7659	691	1363	6725
620	4648	823	3627	6506
Mean Intensity (per unit region)
hTAC-GFP	hTAC-GFP;sid-3(ok973)	hTAC-GFP;sid-3(ok973);DYN-1-MC	hTAC-GFP;dyn-1(RNAi)	hTAC-GFP;dyn-1(RNAi);SID-3-MC
324.35	329.766	330.526	282.152	301.271
334.972	347.499	323.236	305.553	309.954
344.012	333.217	319.865	277.316	307.85
328.988	431.389	322.809	532.267	304.225
326.411	366.694	322.058	293.192	303.319
323.054	326.473	320.828	276.647	286.798
321.18	337.719	321.056	288.153	285.13
318.406	345.424	326.97	309.328	282.939
325.451	359.442	318.757	311.374	329.866
318.535	384.492	319.939	287.535	288.981
294.158	483.066	318.23	284.533	275.81
278.448	331.98	325.294	280.903	286.398
274.073	375.649	322.209	273.4	294.397
267.432	522.702	330.217	274.956	293.169
274.965	333.891	318.164	280.627	283.613
267.937	356.212	323.693	287.91	285.599
281.311	402.231	338.967	269.117	290.537
273.652	334.694	319.85	272.462	288.113
218.137	572.933	317.12	240.393	299.387
219.376	351.663	325.954	224.787	291.568
